# Supplementary material for: Dye degradation and antimicrobial efficacy of cesium-doped Y2O3 nanostructures: in silico docking study
Source: Royal Society of Chemistry journal article supplement (doi:10.1039/d4ra05620e), 2024-01-01
Supplement: d4ra05620e1.pdf [file d4ra05620e1.pdf]

**Dye degradation and antimicrobial efficacy of cesium-doped Y<sub>2</sub>O<sub>3</sub> nanostructures: In silico docking study**

Muhammad Ikram<sup>a,b\*</sup>, Yasir Shabir<sup>c</sup>, Ali Haider<sup>d\*</sup>, Iram Shahzadi<sup>e</sup>, Muhammad Bilal<sup>a</sup>, Anwar Ul-Hamid<sup>f\*</sup>, Ahmed M. Fouda<sup>g</sup>, Salamat Ali<sup>h</sup>

<sup>a</sup>Solar Cell Applications Research Lab, Department of Physics, Government College University Lahore, Lahore, 54000, Punjab, Pakistan

<sup>b</sup>Advance Nanomaterials Research Lab, Department of Physics, Government College University Lahore, Lahore, 54000, Punjab, Pakistan

<sup>c</sup>Department of Physics, Riphah Institute of Computing and Applied Sciences (RICAS), Riphah International University, 14 Ali Road, Lahore, Pakistan

<sup>d</sup>Department of Clinical Medicine, Faculty of Veterinary and Animal Sciences, Muhammad Nawaz Shareef, University of Agriculture, 66000, Multan, Punjab, Pakistan

<sup>e</sup>School of Pharmacy, University of Management and Technology, Lahore, 54770, Pakistan

<sup>f</sup>Core Research Facilities, King Fahd University of Petroleum & Minerals, Dhahran, 31261, Saudi Arabia

<sup>g</sup>Chemistry Department, Faculty of Science, King Khalid University, Abha, 61413, P.O. Box 9004, Saudi Arabia

<sup>h</sup>Department of Physics, The University of Lahore, 54000, Pakistan

Corresponding Author Email: [\\*dr.muhammadikram@gcu.edu.pk](mailto:dr.muhammadikram@gcu.edu.pk) (Muhammad Ikram), Ali Haider ([ali.haider@mnsuam.edu.pk](mailto:ali.haider@mnsuam.edu.pk)), Anwar Ul-Hamid ([anwar@kfupm.edu.sa](mailto:anwar@kfupm.edu.sa))

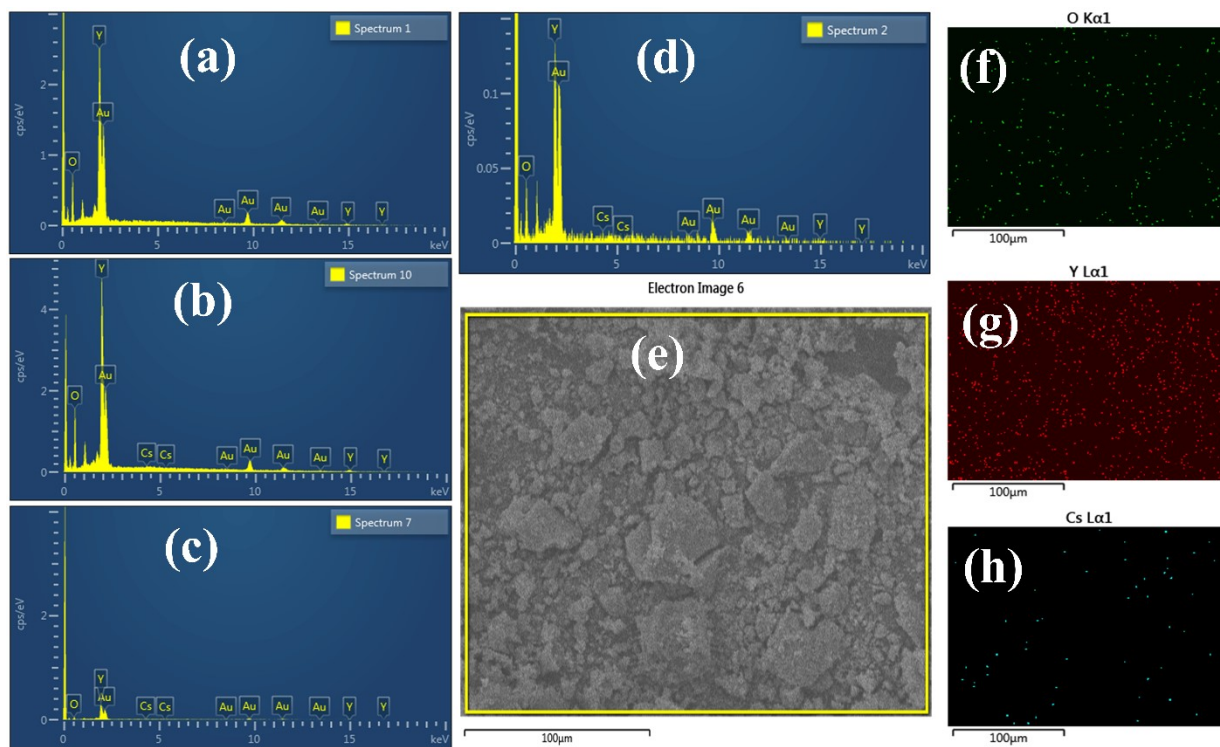

**Fig. S1.** EDS (a-d) and Mapping (e-h) image of Y<sub>2</sub>O<sub>3</sub> and Cs (2, 4 and 6 wt.%) doped Y<sub>2</sub>O<sub>3</sub> NSs
